# Supplementary material for: Porphyrin aggregates decorated MWCNT film for solar light harvesting: influence of J- and H-aggregation on the charge recombination resistance, photocatalysis, and photoinduced charge transfer kinetics
Source: Royal Society of Chemistry journal article supplement (doi:10.1039/c7cp02815f), 2017-01-01
Supplement: c7cp02815f1.pdf [file c7cp02815f1.pdf]

## Electronic Supplementary Information

### Porphyrin ~~Cofacial~~, ~~Coherent~~ Aggregates Decorated MWCNT Film for Solar Light Harvesting: Influence of J- and H- Aggregation on the Charge recombination resistance, Photocatalysis, and Photoinduced Charge Transfer Kinetics

Samrat Devaramani,<sup>a</sup> Mahgoub Ibrahim Shinger,<sup>a</sup> Xiaofang Ma,<sup>a</sup> Meng Yao,<sup>b</sup> Shouting Zhang,<sup>ab</sup> Dongdong Qin,<sup>a</sup> Xiaoquan Lu,<sup>ab\*</sup>

---

<sup>a</sup>Key Laboratory of Bioelectrochemistry & Environmental Analysis of Gansu Province, Colleg of Chemistry & Chemical Engineering, Northwest Normal University, Lanzhou, 730070, P. R. China.

E-mail: [luxq@nwnu.edu.cn](mailto:luxq@nwnu.edu.cn), [taaluxq@gmail.com](mailto:taaluxq@gmail.com) Phone: +86 13993146276.

<sup>b</sup>Tianjin Key Laboratory of Molecular Optoelectronic Science, Department of Chemistry, Tianjin University, Tianjin, 300072, P. R. China

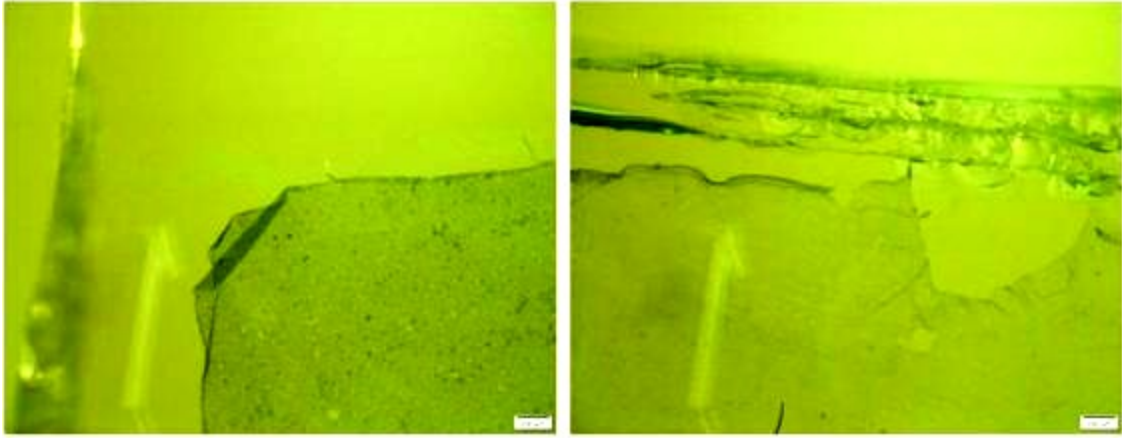

**Fig. S1** Optical microscope images obtained for the different thickness CNTF on the ITO.

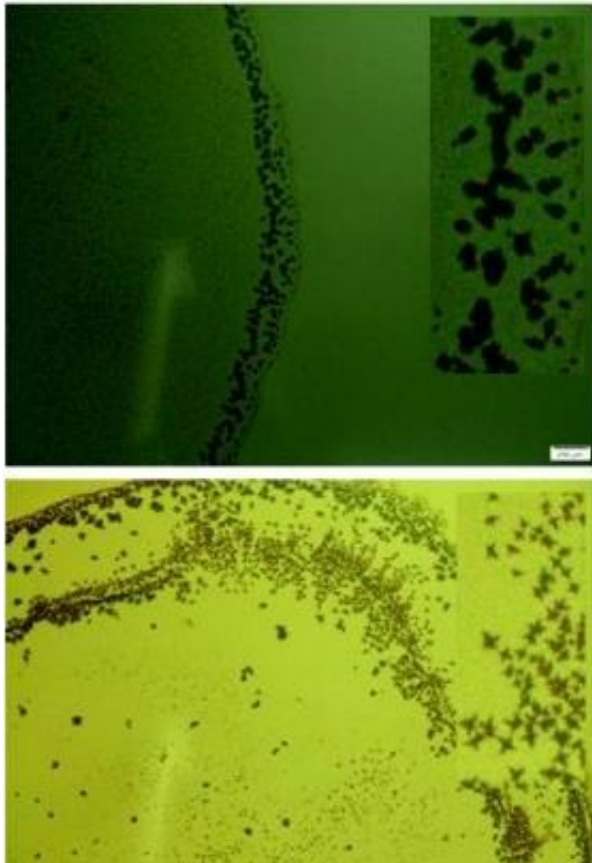

**Fig. S2** Optical microscope images of the J- and H- aggregates top and bottom respectively. Insets show the enhanced images of the corresponding aggregate.

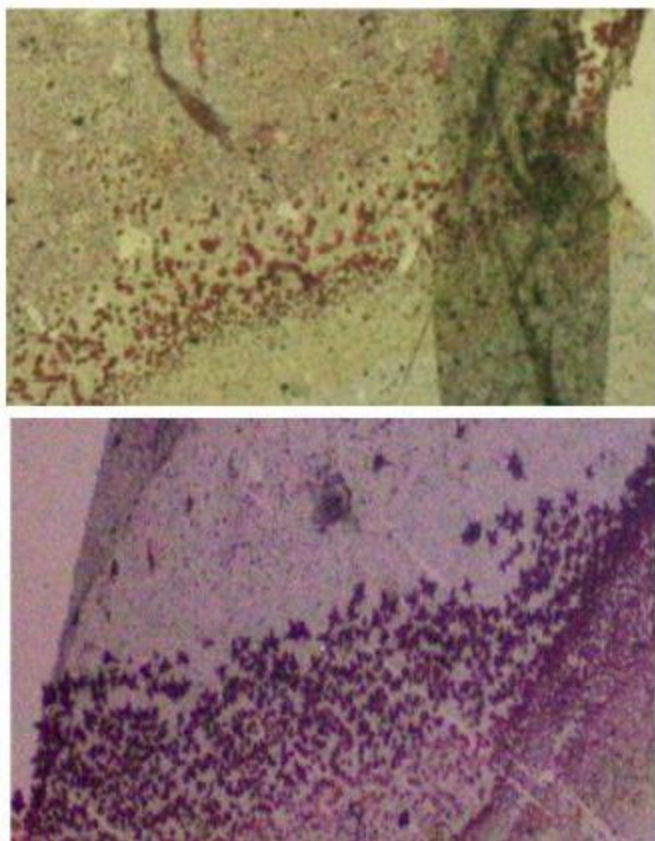

**Fig. S3** Optical microscope images of the J- (top) and H- (bottom) aggregates obtained on the ITO/CNTF.

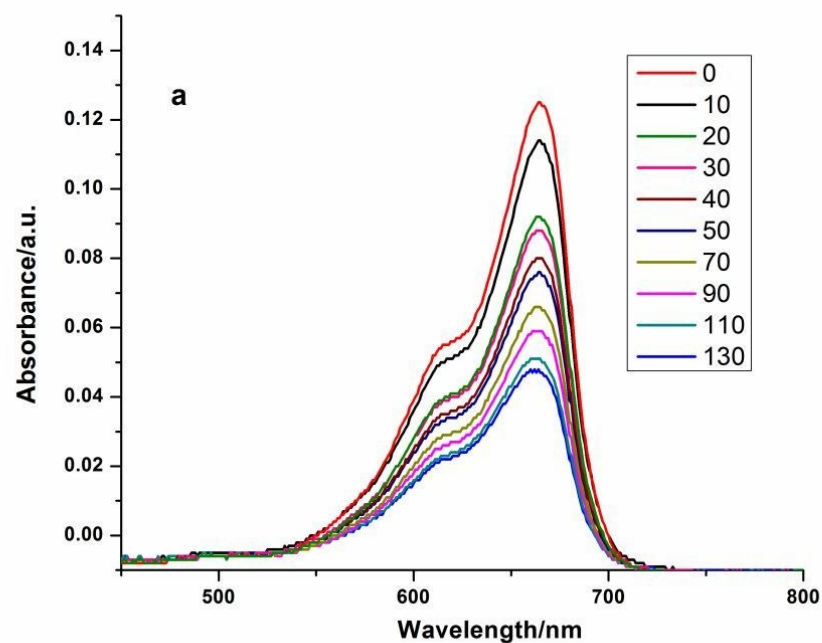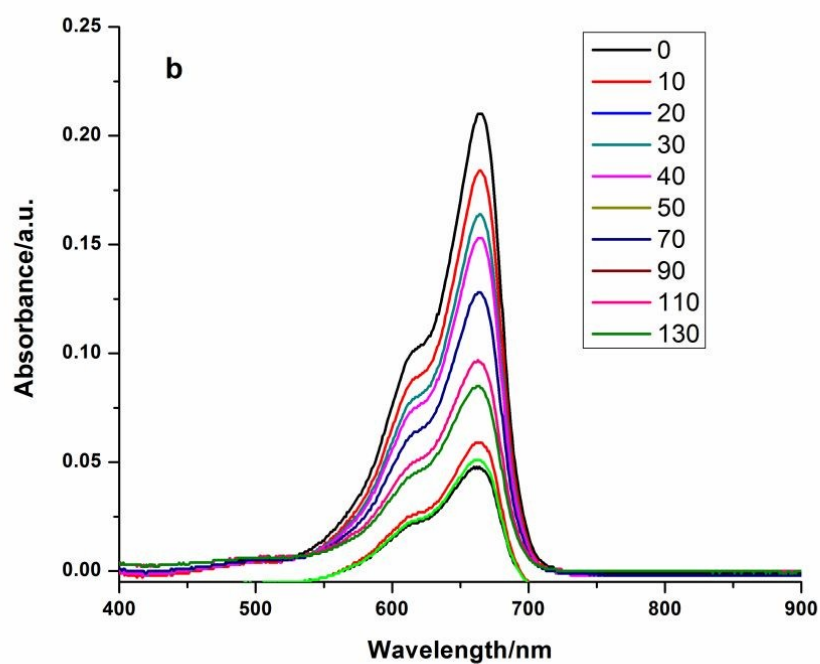

**Fig. S4** Absorption spectra recorded for the MB aliquots taken out at the regular intervals from the ITO/CNTF/H-aggregates and ITO/CNTF/J-aggregates photocatalytic dye decoloration systems.

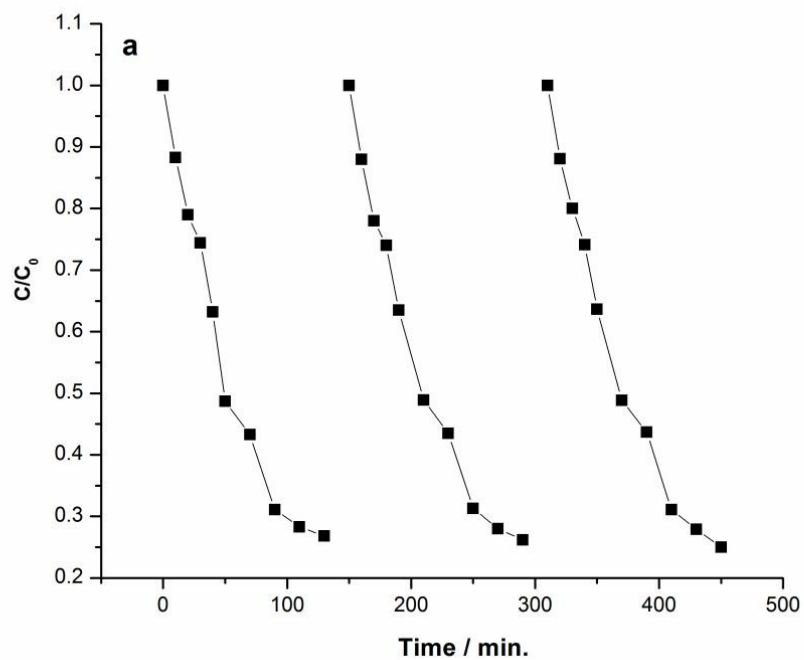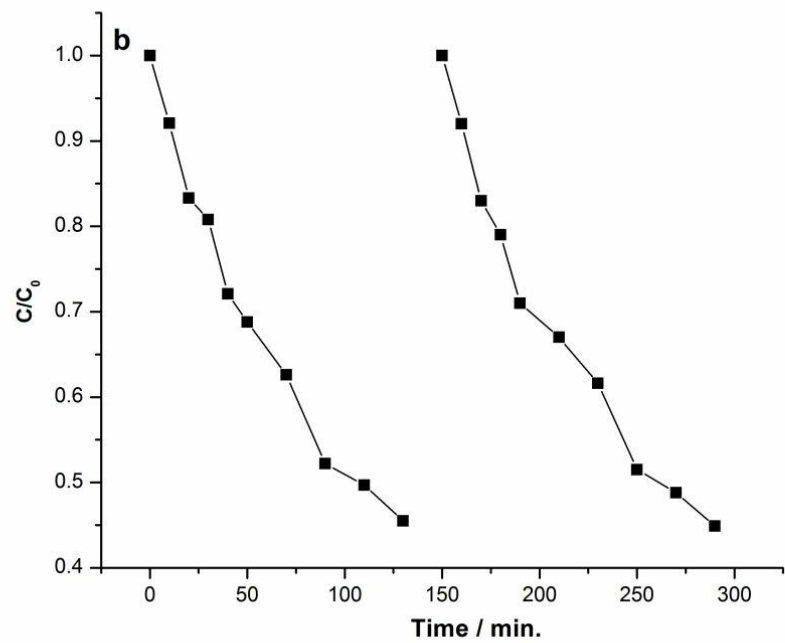

**Fig. S5** Results obtained for the recyclability of ITO/CNTF/J-aggregates (a) and ITO/CNTF/H-aggregates (b) for the photocatalytic MB dye decoloration.

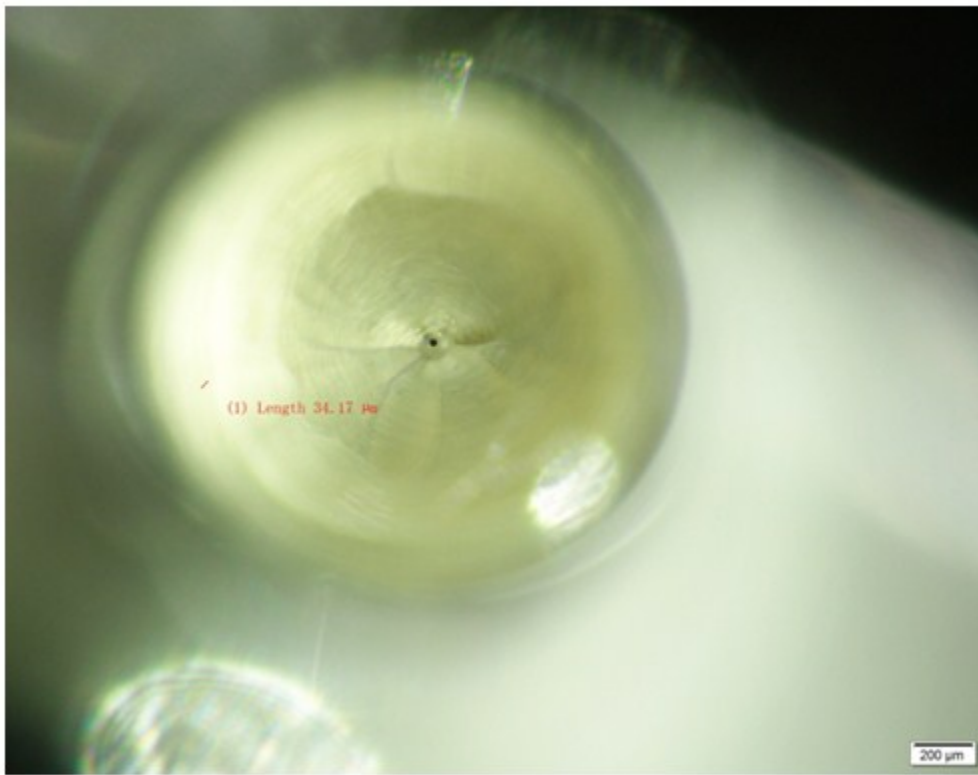

**Fig. S6** Optical microscope image of the ultra micro electrode (tip) with an RG value about 3.

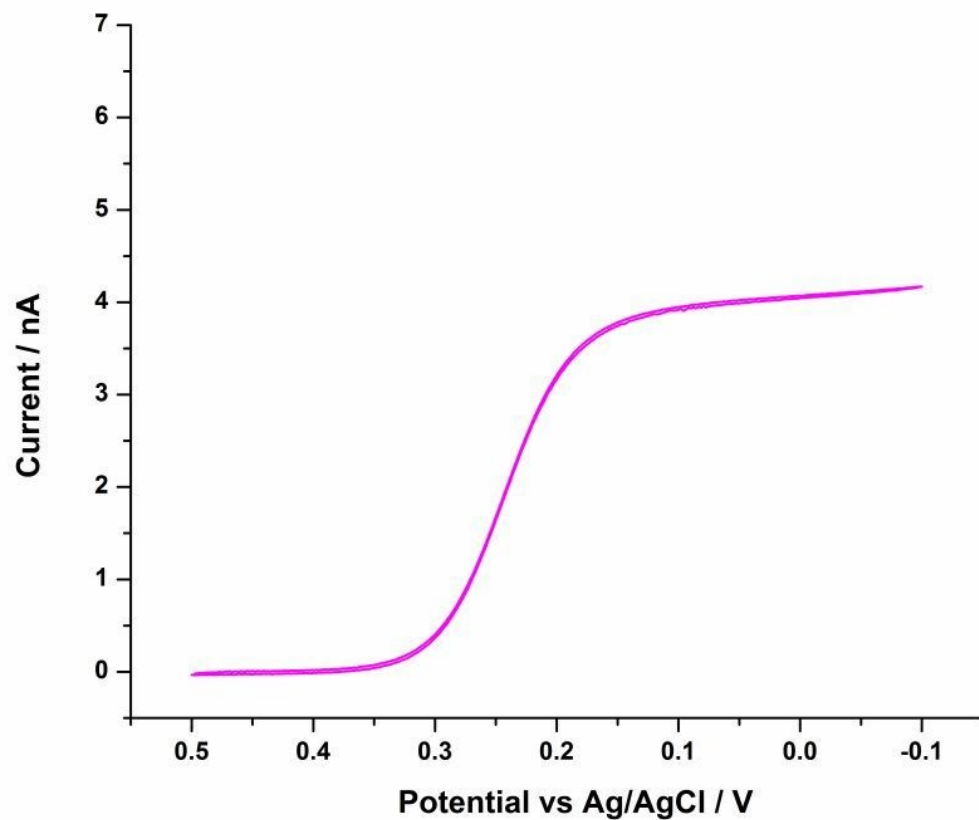

**Fig. S7** Sigmoidal shaped CV obtained for the polished tip for an electrolyte 0.1 M KCl containing 1 mM  $K_3[Fe(CN)_6]$ .

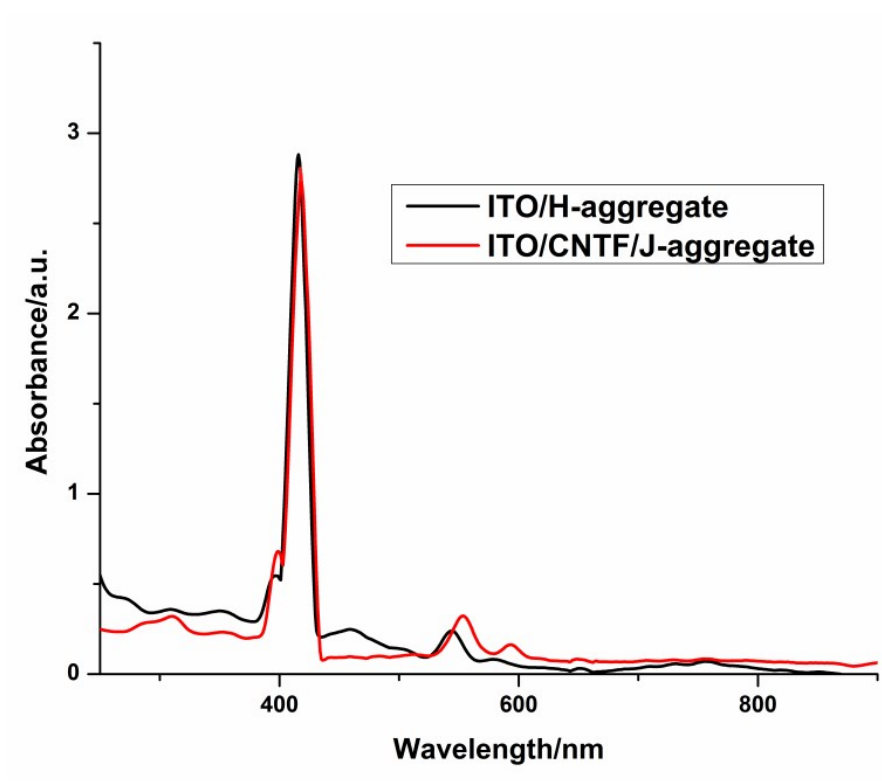

**Fig. S8** Electronic spectra measured after dissolving the ZnTPP loaded on the ITO and ITO/CNTF substrates.
